1 **Research paper**

2

3 Expression of ERV3-1 in Leukocytes of Acute Myelogenous Leukemia Patients

4

5 So Nakagawa<sup>a,b†\*</sup>, Masaharu Kawashima<sup>c,d†</sup>, Yuji Miyatake<sup>d†</sup>, Kai Kudo<sup>d</sup>, Ryutaro  
6 Kotaki<sup>d¶</sup>, Kiyoshi Ando<sup>b,e</sup>, Ai Kotani<sup>b,d\*</sup>

7

8 <sup>a</sup> Department of Molecular Life Science, Tokai University School of Medicine, Isehara,  
9 Kanagawa 259-1193, Japan

10 <sup>b</sup> Institute of Medical Sciences, Tokai University, Isehara, Kanagawa 259-1193, Japan

11 <sup>c</sup> Division of Clinical Oncology and Hematology, The Jikei University School of Medicine,  
12 Minato-ku, Tokyo 105-8471, Japan

13 <sup>d</sup> Department of Hematological Malignancy, Institute of Medical Science, Tokai  
14 University, Isehara, Kanagawa 259-1193, Japan

15 <sup>e</sup> Department of Hematology and Oncology, Tokai University School of Medicine,  
16 Isehara, Kanagawa 259-1193, Japan

17

18 <sup>†</sup> These authors contributed equally to this work.

19

20 <sup>¶</sup> Present address: Department of Immunology, Duke University, Durham, NC 27710,  
21 USA

22

23 \* To whom correspondence should be addressed:

24 So Nakagawa

25 [so@tokai.ac.jp](mailto:so@tokai.ac.jp)

26 Tel: +81-463-93-1121 ext. 2661

27 Fax: +81-463-93-5418

28

29 Ai Kotani

30 [aikotani@k-lab.jp](mailto:aikotani@k-lab.jp)

31 Tel. 81-463-93-1121 ext. 2781

32

33

34

35 **Abstract**

36 Acute myelogenous leukemia (AML) is one of the major hematological malignancies. In  
37 the human genome, several have been found to originate from retroviruses, and some  
38 of which are involved in progression of various cancers. Hence, to investigate whether  
39 retroviral-like genes are associated with the development of AML, we conducted a  
40 transcriptome sequencing analysis of 12 retroviral-like genes of 150 AML patients using  
41 The Cancer Genome Atlas database. We found high expression of ERV3-1, an  
42 envelope gene of endogenous retrovirus group 3 member 1. In particular, blood and  
43 bone marrow cells of the myeloid lineage in AML patients, exhibited higher expression  
44 of ERV3-1 than those of the monocytic AML lineage. We also examined the protein  
45 expression of ERV3-1 by immunohistochemical analysis and found expression of  
46 ERV3-1 protein in 7 out of 12 AML patients, with a particular concentration observed at  
47 the membrane of some leukemic cells. Transcriptome analysis further suggested that  
48 upregulated ERV3-1 expression may be associated with chromosome 8 trisomy as  
49 anomaly was found to be more common among the high expression group compared to  
50 the low expression group. However, this finding was not corroborated by the  
51 immunohistochemical data. This discrepancy may have been caused, in part, by the  
52 small number of samples analyzed in this study. Although the precise associated  
53 molecular mechanisms remain unclear, our results suggest that ERV3-1 may be  
54 involved in AML development.

55 **(226 words)**

56

57 **Keywords:** endogenous retrovirus, acute myelogenous leukemia, cancer development,  
58 immunosuppression

59

60 **Highlights**

- 61 ● Expression of 12 retroviral-like genes in the human genome were analyzed using  
62 transcriptome data of 150 acute myelogenous leukemia (AML) patients.
- 63 ● ERV3-1, an envelope gene of endogenous retrovirus group 3 member 1, was found  
64 to uniquely show high expression level.
- 65 ● Morphologic characteristics and chromosomal abnormalities are found to be related  
66 with the expression of ERV3-1.

67

## 68 **1. Introduction**

69           Approximately 8% of the human genome corresponds to retroviral origins  
70 (Lander et al. 2001). These areas of the genome are referred to as long terminal repeat  
71 (LTR) retrotransposons, many of which correspond to human endogenous retroviruses  
72 (HERVs). HERVs originally derived from retroviruses that infected germline cells of the  
73 host species. Therefore, HERVs contain retroviral genetic elements including  
74 cis-regulatory regions (LTRs) in their 5' and 3' terminals, as well as several coding  
75 sequences: gag, protease, polymerase, and envelope. The structures of other LTR  
76 retrotransposons are similar to that of HERV except for the absence of an envelope  
77 gene. Generally, HERVs are incapable of generating infectious virions that can  
78 competently replicate in human cells due to the accumulation of multiple mutations  
79 during evolution (Tönjes et al. 1999). Therefore, such retroviral sequences are believed  
80 to be “junk” DNA in the human genome. However, many recent studies showed that  
81 certain sequences, similar to those of retroviruses, have obtained new functions in the  
82 hosts.

83           In the human genome, at least 12 retroviral-like genes are annotated in the  
84 GRCh38 assembly provided by National Center for Biotechnology Information (NCBI):  
85 *ARC*, *ASPRV1/SASpase*, *ERV3-1*, *ERVK13-1*, *ERVH48-1/Suppressyn*,  
86 *ERVMER34-1/HEMO*, *ERVV-1*, *ERVV-2*, *ERVW-1/Syncytin-1*, *ERVFRD-1/Syncytin-2*,  
87 *PEG10/SIRH1*, *PEG11/RTL1/SIRH2*, *RTL4/ ZCCHC16/SIRH11* and *SIRH7/LDOC1*.  
88 *ERVW-1/Syncytin-1* and *ERVFRD-1/Syncytin-2* are the most well studied retroviral-like  
89 genes corresponding to retroviral envelope genes (Mi et al. 2000, Blaise et al. 2003),  
90 both of which are involved in human placenta development. Specifically, these genes  
91 are associated with cell-cell fusion and immunosuppression, both of which function are  
92 quite similar to those operated by envelope proteins of retroviruses (Kim et al. 2004).

93 Those molecular functions may be also related to cancer progression. Indeed,  
94 Syncytin-1 and Syncytin-2 are reported to be involved in cancer development (Larsen et  
95 al. 2009). In addition, an LTR retrotransposon-derived PEG10/Sirh1 that is similar to a  
96 gag-pro-like gene is involved in placenta development (Ono et al. 2006), as well as in  
97 the progression of various cancers including pancreatic carcinoma, breast cancer,  
98 prostate cancer, gallbladder carcinoma, thyroid cancer, oral squamous cell carcinoma,  
99 colon cancer, enchondromas, and B-cell chronic lymphocytic leukemia (reviewed in Xie  
100 et al. 2018). Indeed, these retroviral-like genes originate from viruses making their  
101 unexpected expression potentially harmful to humans (Gonzalez-Cao et al. 2016).

102 Acute myelogenous leukemia (AML) is one of the major hematological  
103 malignancies, characterized by overproduction of myeloid progenitor cells in the bone  
104 marrow, which then rapidly migrates to the blood, and in some cases, can spread to  
105 other organs, such as liver and spleen. AML is associated with curative rates of 35 to  
106 40% in patients aged < 60 years (Döhner et al. 2010); however, the number of AML  
107 patients increase with age, and 70% of patients  $\geq$  65 years die of the disease within a  
108 year, despite treatment (Meyers et al. 2013). The French-American-British (FAB)  
109 classification system is a standard classification of AML patients that are divided into  
110 eight different subtypes (M0 through M7) based on morphologic characteristics (Bennett  
111 et al. 1976): undifferentiated acute myeloblastic leukemia (M0), acute myeloblastic  
112 leukemia with minimal maturation (M1), acute myeloblastic leukemia with maturation  
113 (M2), acute promyelocytic leukemia (M3), acute myelomonocytic leukemia (M4), acute  
114 monocytic leukemia (M5), acute erythroid leukemia (M6), and acute megakaryoblastic  
115 leukemia (M7).

116 Although numerous studies suggested relationships between HERVs and  
117 leukemia including AML (Depil et al. 2002; Chen et al. 2013; Bergallo et al. 2017;

118 Cuellar et al. 2017; Deniz et al. 2020), details regarding the roles of retroviral-like genes  
119 in AML remain unclear, particularly as they pertain to the different AML subtypes.  
120 Therefore, in this study, we evaluated expression of retroviral-like genes in leukocytes of  
121 AML patients that are potentially harmful to AML. To this end, we first examined  
122 RNA-seq data obtained from 150 AML patients that were downloaded from The Cancer  
123 Genome Atlas (TCGA) database (<https://www.cancer.gov/tcga>). We then screened the  
124 expression of the abovementioned 12 retroviral-like genes and statistically examined  
125 the relationship between the expression levels and FAB subtypes, with exception of M6  
126 and M7 cases, as they are relatively rare in AML (< 5%) (Bennett et al. 1976). We  
127 further validated the protein expression of the highly expressed retroviral-like gene in  
128 the leukemic cells obtained from AML patients by immunostaining and investigated  
129 whether the gene could be related to the progress of AML.

130

131

132 **2. Materials and Methods**

133 **2.1 Ethics**

134 This study was approved by the Institutional Review Board of Tokai University School of  
135 Medicine, of which protocol numbers are 15-I-26, 18-I-08 and 19-R-323 for  
136 immunohistochemistry and clinical sequencing data analyses of AML patients. Informed  
137 consent was provided according to the Helsinki Declaration in the Tokai University  
138 Hospital.

139

140 **2.2 Cancer genome data analysis**

141 Sequence and annotation data of the human genome GRCh38 was downloaded from  
142 the Illumina iGenomes  
143 ([https://support.illumina.com/sequencing/sequencing\\_software/igenome.html](https://support.illumina.com/sequencing/sequencing_software/igenome.html)). We also  
144 obtained RNA-seq data and clinical record data for 150 AML patients from TCGA-LAML  
145 database (<https://portal.gdc.cancer.gov/projects/TCGA-LAML>), which are summarized  
146 in the Supplementary data (Table S1 – S3). In this study, we used the RNA-seq data of  
147 which sequences are mapped to the human genome GRCh38 (BAM files) using STAR  
148 2 (Dobin et al. 2013) provided by TCGA-LAML. We counted the mapped reads based  
149 on the gene annotation, and computed expression scores of TPM (transcripts per  
150 million) using StringTie2 version 2.0.6 (Kovaka et al. 2019). We extracted the TPM  
151 scores of 12 retroviral-like genes: *ARC*, *ASPRV1/SASpase*, *ERV3-1*, *ERVK13-1*,  
152 *ERVH48-1/Suppressyn*, *ERVMER34-1/HEMO*, *ERVV-1*, *ERVV-2*, *ERVW-1/Syncytin-1*,  
153 *ERVFRD-1/Syncytin-2*, *PEG10/SIRH1*, *PEG11/RTL1/SIRH2*, *RTL4/ZCCHC16/SIRH11*,  
154 and *SIRH7/LDOC1*, which are also summarized in the Supplementary data (Table S1).  
155 The TPM scores were log-transformed as follows:  $\log_2(\text{TPM}+1)$ . Using the  
156 log-transformed TPM scores, we generated a heatmap of 12 retroviral-like genes using

157 the heatmap.2 program in the gplots package of R (<https://github.com/talgalili/gplots>).

158

### 159 **2.3 Statistical analysis**

160 Normal variables were assessed by Fisher's exact test. Continuous variables were  
161 assessed by Mann-Whitney *U* test or Kruskal-Wallis test for two or multiple groups,  
162 respectively. Data are presented as the mean  $\pm$  standard deviation (SD). A *P* value <  
163 0.05 was considered statistically significant.

164

### 165 **2.4 Immunohistochemistry**

166 To confirm ERV3-1 protein expression in AML, immunohistochemical (IHC) staining of  
167 ERV3-1 was performed on 12 cases of AML patients using paraffin-embedded bone  
168 marrow clot sections at Tokai University School of Medicine. Paraffin-embedded tissue  
169 sections were stained with hematoxylin-eosin. For immunostaining, an anti-human  
170 ERV3 antibody (rabbit polyclonal clone; Santa Cruz Biotechnology, CA), as a primary  
171 antibody, and anti-rabbit peroxidase histofine simple stain kit (Nichirei, Tokyo), as a  
172 secondary antibody, were used. The immunostaining tissue slides were observed by  
173 Olympus BX 63 microscope and cellSens software.

174



175 **3. Results**

176 We first examined the expression level of ERV3-1 from 150 RNA-seq data of  
177 blood and bone marrow of AML patients obtained from the TCGA database as  
178 summarized in the Supplementary data (Table S1). All sequencing reads were mapped  
179 to the human genome (GRCh38). Based on the mapped results, we measured the  
180 expression levels of all genes using the human genome annotation. We then compared  
181 the expression levels of 12 retroviral-like genes described in the Materials and Methods  
182 section. Figure 1 shows a heatmap of the expression in 150 samples measured by  
183 log-transformed TPM (transcripts per million) scores (see Materials and Methods).  
184 ERV3-1 was found to exhibit higher expression compared to eleven of the other  
185 retroviral-like genes. Indeed, the average and median TPM scores of ERV3-1 were 46.7  
186 and 39.5, whereas those of the others were 2.4 and 0.2, respectively. We also  
187 examined the expression level of ERV3-1 in the GTEx database  
188 (<https://www.gtexportal.org/>), which collects various RNA-seq data from healthy people,  
189 and found that the median TPM score of whole blood is 4.6, and the highest expression  
190 score (27.3) was observed in adrenal gland. These results further indicate an  
191 upregulated expression of ERV3-1 in blood-bone marrow of AML patients.

192 We then evaluated relationship between ERV3-1 expression and clinical data,  
193 such as age, gender, cytogenetic risk, white cell count, and French-American-British  
194 (FAB) classification, as summarized in the Supplementary data (Table S2). We selected  
195 patients in the upper 20 and lower 20 percentiles of ERV3-1 expression (designated as  
196 the ERV3-1 high and low groups, respectively). In total, 60 patients were analyzed, the  
197 results for which are shown in Table 1 and the Supplementary data (Table S3). We  
198 found that ERV3-1 expression was not associated with age, gender, or white blood cell  
199 count, using the Mann-Whitney U test. Meanwhile, the cytogenetic risk is found to differ

200 between the ERV3-1 high and low groups ( $P = 0.016$ ). Moreover, the expression of  
201 ERV3-1 in AML FAB M0-M3 (myeloid phenotype) was higher than that of FAB M4-M5  
202 (monocytic phenotype) ( $P < 0.001$ , Table 1 and Figure 2A). We then confirmed these  
203 observations using the whole 150 TCGA-LAML cases. All clinical data, excluding FAB  
204 classification, were not statistically associated with ERV3-1 expression (Figure S1).  
205 Hence, only FAB classification was statistically associated ( $P < 0.001$ , Figure 2B).  
206 Collectively, our transcriptome data analysis suggests that the blood and bone marrow  
207 of myeloid phenotype (FAB M0-M3) AML patients show higher expression levels of  
208 ERV3-1 than those of monocytic phenotype (FAB M4-M5).

209         To examine the protein expression of ERV3-1 in bone marrow from AML  
210 patients, we conducted an immunohistochemical analysis for 12 AML patients at the  
211 Tokai University School of Medicine in Japan. Patients' characteristics are summarized  
212 in Table 2. A previous study reported the expression of ERV3, including ERV3-1, in  
213 U-937 cells, which are one of AML cell lines classified as monocytic phenotype of AML  
214 (Larsson et al. 1996). Thus, we selected AML patients shown monocytic component  
215 classified as FAB M4-M5. In more than half of the cases (7/12), expression of ERV3-1  
216 was detected, and, in particular, ERV3-1 was expressed at some of the leukemic cell  
217 membrane (Figure 3). The results clearly suggest that ERV3-1 RNA in blood-bone  
218 marrow of AML patients was translated and expressed as protein. Moreover,  
219 considering that our transcriptome analysis revealed low expression of ERV3-1 in  
220 M4-M5 group compared to M0-M3 group in the TCGA-LAML data (Figure 2), most  
221 M0-M3 probably cases likely contain ERV3-1 protein in tumor cells as well.

222         We also evaluated association between ERV3-1 expression and chromosomal  
223 abnormalities and genetic mutations, which are considered to be involved in AML  
224 progression (Short et al. 2018). Specifically, chromosomal abnormalities, such as

225 translocation chromosomes t (15;17) and t (8;21), and trisomy of chromosome 8, are  
226 reportedly associated with AML (Vickers et al. 2000). We, therefore, focused on these  
227 anomalies in our analysis. Results show that trisomy 8 was more common in the  
228 ERV3-1 high group compared to those of the low group (Table S1,  $P = 0.0232$ ). In our  
229 immunostaining analysis, however, the prevalence of trisomy 8 has not been a clear  
230 difference in both ERV3-1 positive (only Patient 9) and negative (Patient 10) cases  
231 (Table 2). We also evaluated three major mutations that related with AML: fms-related  
232 tyrosine kinase 3 (FLT3), isocitrate dehydrogenase 1 (IDH1), and nucleophosmin 1  
233 (NPM1); however, no significant associations were detected between these mutations  
234 and ERV3-1 expression, as shown in the Supplementary data (Table S4).

235

236

237 **4. Discussion**

238           Although many retroviral-like genes have been shown to be related to cancer  
239 development (Gonzalez-Cao et al. 2016), here we specifically found that ERV3-1 shows  
240 exclusively a high expression level in blood and bone marrow of all of AML patients  
241 using TCGA database (Figure 1). We also confirmed that ERV3-1 protein was detected  
242 in more than half of AML M4-M5 patients (7/12) (Figure 3). Although we have not  
243 examined the protein expression of ERV3-1 in blood-bone marrow of AML M0-M3, we  
244 found that mRNA expression level is higher in AML M0-M3 than in AML M4-M5 (Figure  
245 2) suggesting that patients of AML M0-M3 may express the ERV3-1 protein as well.  
246 Those results indicate that ERV3-1 protein as well as mRNAs may be expressed in  
247 blood-bone marrow of most of AML patients.

248           ERV3-1 is an envelope gene of the endogenous retrovirus group 3 member 1,  
249 which belongs to the HERV-R family. It is known that retroviral envelope gene is  
250 involved in various biological processes, including infection and immunosuppression.  
251 Indeed, ERV3-1 was reportedly expressed in placenta (Venables et al. 1995; Lin et al.  
252 2000; Blaise et al. 2007) and in colorectal cancers (Lee et al. 2014). Although ERV3-1  
253 lost its fusogenic activity (Blaise et al. 2007), it contains an immunosuppressive region  
254 in the transmembrane domain, termed p15E, of C-type retroviruses, suggesting that  
255 ERV3-1 may serve to suppress immune response (Venables et al. 1995). Indeed,  
256 immunosuppressive region of another retroviral envelope-derived gene, syncytin-2,  
257 supports the injection of MCA205 mouse fibrosarcoma cell line in mice (Mangenev et al.  
258 2007). Therefore, immunosuppressive activity of ERV3-1 could potentially be related to  
259 the progress of AML.

260           AML forms an immunosuppressive microenvironment by increasing the  
261 number of myeloid-derived suppressor cells in the peripheral blood, as well as

262 regulatory T cells in both the peripheral blood and bone marrow (Beyar-Katz et al. 2018).  
263 In fact, allogeneic hematopoietic cell transplantation, one of the T-cell based  
264 immunotherapy, is the most effective in post-remission therapy, and is commonly used  
265 for AML treatment (Koreth et al. 2009). AML cell spontaneously fused with murine  
266 macrophages, endothelial, and dendritic cells, which may lead to dissemination of the  
267 disease (Martin-Padura et al. 2012). This observation suggests that  
268 immunosuppressive function of ERV3-1 might be involved in AML progression.

269         Although 150 cases show high ERV3-1 mRNA expression levels (Figure 1), we  
270 were unable to confirm the protein expression of ERV3-1 in 5 of 12 cases (Figure 3). We  
271 were also unable to identify an association of ERV3-1 expression with chromosomal  
272 abnormalities and genetic mutations (Table S1). These results might suggest that  
273 ERV3-1 is not an essential factor in AML development, but rather plays a supportive role.  
274 Therefore, the factor that affects ERV3-1 expression of AML, as well as the role of  
275 ERV3-1 in AML, should be further investigated. Moreover, considering that many  
276 viral-derived sequences have been described in eukaryote genomes that have not yet  
277 been annotated in the genome database (Nakagawa and Takahashi 2016; Pertea et al.  
278 2018; Kryukov et al. 2019) and that these viral-derived genes are dynamically altered  
279 during evolution (Imakawa et al. 2015; Imakawa and Nakagawa 2017; Pastuzyn et al.  
280 2018). Therefore, not only ERV3-1 but also other unknown viral-derived genes could be  
281 also involved in the progress of AML.

282

283

284 **Abbreviations**

285 AML: acute myelogenous leukemia  
286 ERV: endogenous retrovirus  
287 FAB: French-American-British  
288 LTR: long terminal repeat  
289 FAB: French-American-British Classification  
290 TCGA: The Cancer Genome Atlas  
291 TPM: transcripts per million

292

293 **Declaration of Interest**

294 None.

295

296 **Author's contributions**

297 S.N. and A.K. conceived the study idea. S.N. and M.K. conducted the data analysis.  
298 Y.M., K.K., R.K. and A.K. conducted experiments. M.K., K.A. and A.K. interpreted the  
299 data. S.N., M.K. and A.K. wrote the manuscript. All authors read and approved the final  
300 manuscript.

301

302 **Funding**

303 This study was funded by JSPS KAKENHI Grants-in-Aid for Scientific Research on  
304 Innovative Areas (16H06429, 16K21723, 17H05823, 19H04843 to SN), Challenging  
305 Exploratory Research (19K22365 to SN), Scientific Research (C) (20K06775 to SN), by  
306 Japan Agency for Medical Research and Development (AMED) of Research Program on  
307 Hepatitis (20fk0210054s0202 to AK) and Project for Cancer Research and Therapeutic  
308 Evolution (20cm0106275h0001, 20cm0106274h0001 to AK), and by research fund of  
309 Medical Research Institute, Tokai University.

310

311 **Acknowledgement**

312 The results shown here are in part based upon data generated by the TCGA Research  
313 Network: <https://www.cancer.gov/tcga>. Computations in this work were performed in  
314 part on the NIG supercomputer at ROIS National Institute of Genetics and SHIROKANE  
315 at Human Genome Center (the Univ. of Tokyo).

316

317

318 **References**

- 319 Bennett, J.M., Catovsky, D., Daniel, M.T., Flandrin, G., Galton, D.A., Gralnick, H.R.,  
320 Sultan, C., 1976. Proposals for the classification of the acute leukaemias.  
321 French-American-British (FAB) co-operative group. *Br. J. Haematol.* 33, 451-458.
- 322 Bergallo, M., Montanari, P., Mareschi, K., Merlino, C., Berger, M., Bini, I., Dapra, V.,  
323 Galliano, I., Fagioli, F., 2017. Expression of the pol gene of human endogenous  
324 retroviruses HERV-K and -W in leukemia patients. *Arch. Virol.* 162, 3639-3644.
- 325 Beyar-Katz, O., Gill, S., 2018. Novel approaches to acute myeloid leukemia  
326 immunotherapy. *Clin. Cancer Res.* 24, 5502-5515.
- 327 Blaise, S., de Parseval, N., Bénit, L., Heidmann, T., 2003. Genomewide screening for  
328 fusogenic human endogenous retrovirus envelopes identifies syncytin 2, a gene  
329 conserved on primate evolution. *Proc. Natl. Acad. Sci. U. S. A.* 100, 13013-13018.
- 330 Chen, T., Meng, Z., Gan, Y., Wang, X., Xu, F., Gu, Y., Xu, X., Tang, J., Zhou, H., Zhang,  
331 X., Gan, X., Van Ness, C., Xu, G., Huang, L., Zhang, X., Fang, Y., Wu, J., Zheng, S.,  
332 Jin, J., Huang, W., Xu, R., 2013. The viral oncogene Np9 acts as a critical molecular  
333 switch for co-activating beta-catenin, ERK, Akt and Notch1 and promoting the growth  
334 of human leukemia stem/progenitor cells. *Leukemia.* 27, 1469-1478.
- 335 Cuellar, T.L., Herzner, A.M., Zhang, X., Goyal, Y., Watanabe, C., Friedman, B.A.,  
336 Janakiraman, V., Durinck, S., Stinson, J., Arnott, D., Cheung, T.K., Chaudhuri, S.,  
337 Modrusan, Z., Doerr, J.M., Classon, M., Haley, B., 2017. Silencing of  
338 retrotransposons by SETDB1 inhibits the interferon response in acute myeloid  
339 leukemia. *J. Cell Biol.* 216, 3535-3549.
- 340 Deniz, Ö., Ahmed, M., Todd, C.D., Rio-Machin, A., Dawson, M.A., Branco, M.R., 2020.  
341 Endogenous retroviruses are a source of enhancers with oncogenic potential in acute  
342 myeloid leukaemia. *Nat. Commun.* 11, 3506.
- 343 Depil, S., Roche, C., Dussart, P., Prin, L., 2002. Expression of a human endogenous  
344 retrovirus, HERV-K, in the blood cells of leukemia patients. *Leukemia.* 16, 254-259.
- 345 Dobin, A., Davis, C.A., Schlesinger, F., Drenkow, J., Zaleski, C., Jha, S., Batut, P.,  
346 Chaisson, M., Gingeras, T.R., 2013. STAR: ultrafast universal RNA-seq aligner.  
347 *Bioinformatics.* 29, 15-21.
- 348 Döhner, H., Estey, E.H., Amadori, S., Appelbaum, F.R., Büchner, T., Burnett, A.K.,  
349 Dombret, H., Fenaux, P., Grimwade, D., Larson, R.A., Lo-Coco, F., Naoe, T.,  
350 Niederwieser, D., Ossenkoppele, G.J., Sanz, M.A., Sierra, J., Tallman, M.S.,  
351 Löwenberg, B., Bloomfield, C.D., 2010. Diagnosis and management of acute myeloid  
352 leukemia in adults: recommendations from an international expert panel, on behalf of  
353 the European LeukemiaNet. *Blood.* 115, 453-474.
- 354 Gonzalez-Cao, M., Iduma, P., Karachaliou, N., Santarpia, M., Blanco, J., Rosell, R.,

- 355 2016. Human endogenous retroviruses and cancer. *Cancer Biol. Med.* 13, 483–488.
- 356 Imakawa, K., Nakagawa, S. Miyazawa, T., 2015. Baton pass hypothesis: Successive  
357 incorporation of unconserved endogenous retroviral genes for placentation during  
358 mammalian evolution. *Genes Cells.* 20, 771-788.
- 359 Imakawa, K., Nakagawa, S., 2017. The phylogeny of placental evolution through  
360 dynamic integrations of retrotransposons. *Prog. Mol. Biol. Transl. Sci.* 145, 89-109.
- 361 Kim, F.J., Battini, J.L., Manel, N., Sitbon, M., 2004. Emergence of vertebrate  
362 retroviruses and envelope capture. *Virology.* 318, 183-191.
- 363 Koreth, J., Schlenk, R., Kopecky, K.J., Honda, S., Sierra, J., Djulbegovic, B.J., Wadleigh,  
364 M., DeAngelo, D.J., Stone, R.M., Sakamaki, H., Appelbaum, F.R., Döhner, H., Antin,  
365 J.H., Soiffer, R.J., Cutler, C., 2009. Allogeneic stem cell transplantation for acute  
366 myeloid leukemia in first complete remission: systematic review and meta-analysis of  
367 prospective clinical trials. *JAMA.* 301, 2349-2361.
- 368 Kovaka, S., Zimin, A.V., Pertea, G.M., Razaghi, R., Salzberg, S.L., Pertea, M., 2019.  
369 Transcriptome assembly from long-read RNA-seq alignments with StringTie2,  
370 *Genome Biol.* 20, 278.
- 371 Kryukov, K., Ueda, M.T., Imanishi, T., Nakagawa, S., 2019. Systematic survey of  
372 non-retroviral virus-like elements in eukaryotic genomes. *Virus Res.* 262, 30-36.
- 373 Lander, E.S. et al. 2001. Initial sequencing and analysis of the human genome. *Nature.*  
374 409, 860–921.
- 375 Larsen, J.M., Christensen, I.J., Nielsen, H.J., Hansen, U., Bjerregaard, B., Talts, J.F.,  
376 Larsson, L.I., 2009. Syncytin immunoreactivity in colorectal cancer: Potential  
377 prognostic impact. *Cancer Lett.* 280, 44-49.
- 378 Larsson, E., Venables, P.J., Andersson, A.C., Fan, W., Rigby, S., Botling, J., Oberg, F.,  
379 Cohen, M., Nilsson, K., 1996. Expression of the endogenous retrovirus ERV3  
380 (HERV-R) during induced monocytic differentiation in the U-937 cell line. *Int. J.*  
381 *Cancer.* 67, 451-456.
- 382 Lee S.H., Kang Y.J., Jo J.O., Ock, M.S., Baek, K.W., Eo, J., Lee, W.J., Choi, Y.H. Kim,  
383 W.J., Leem, S.H., Kim, H.S., Cha, H.J., 2014. Elevation of human ERV3-1 env protein  
384 expression in colorectal cancer. *J. Clin. Pathol.* 67, 840–844.
- 385 Lin, L., Xu, B., Rote, N.S., 2000. The cellular mechanism by which the human  
386 endogenous retrovirus ERV-3 env gene affects proliferation and differentiation in a  
387 human placental trophoblast model, BeWo. *Placenta.* 21, 73-78.
- 388 Mangeney, M., Renard, M., Schlecht-Louf, G., Bouallaga, I., Heidmann, O., Letzelter, C.,  
389 Richaud, A., Ducos, B., Heidmann, T., 2007. Placental syncytins: Genetic disjunction  
390 between the fusogenic and immunosuppressive activity of retroviral envelope  
391 proteins. *Proc. Natl. Acad. Sci. U. S. A.* 104, 20534-20539.



- 392 Martin-Padura, I., Marighetti, P., Gregato, G., Agliano, A., Malazzi, O., Mancuso, P.,  
393 Pruneri, G., Viale, A., Bertolini, F., 2012. Spontaneous cell fusion of acute leukemia  
394 cells and macrophages observed in cells with leukemic potential. *Neoplasia*. 14,  
395 1057-1066.
- 396 Meyers, J., Yu, Y., Kaye, J.A., Davis, K.L., 2013. Medicare fee-for-service enrollees with  
397 primary acute myeloid leukemia: an analysis of treatment patterns, survival, and  
398 healthcare resource utilization and costs. *Appl. Health Econ. Health Policy*. 11,  
399 275-286.
- 400 Mi, S., Lee, X., Li, X., Veldman, G.M., Finnerty, H., Racie, L., LaVallie, E., Tang, X.Y.,  
401 Edouard, P., Howes, S., Keith, J.C., McCoy, J.M., 2000. Syncytin is a captive  
402 retroviral envelope protein involved in human placental morphogenesis. *Nature*. 403,  
403 785-789.
- 404 Nakagawa, S., Takahashi, M.U., 2016. gEVE: a genome-based endogenous viral  
405 element database provides comprehensive viral protein-coding sequences in  
406 mammalian genomes. *Database*. 2016, baw087.
- 407 Ono, R., Nakamura, K., Inoue, K., Naruse, M., Usami, T., Wakisaka-Saito, N., Hino, T.,  
408 Suzuki-Migishima, R., Ogonuki, N., Miki, H., Kohda, T., Ogura, A., Yokoyama, M.,  
409 Kaneko-Ishino, T., Ishino, F., 2006. Deletion of Peg10, an imprinted gene acquired  
410 from a retrotransposon, causes early embryonic lethality. *Nat. Genet.* 38, 101-106.
- 411 Pastuzyn, E.D., Day, C.E., Kearns, R.B., Kyrke-Smith, M., Taibi, A.V., McCormick, J.,  
412 Yoder, N., Belnap, D.M., Erlendsson, S., Morado, D.R., Briggs, J.A.G., Feschotte, C.,  
413 Shepherd, J.D., 2018. The neuronal gene *Arc* encodes a repurposed retrotransposon  
414 Gag protein that mediates intercellular RNA transfer. *Cell*. 172, 275-288.
- 415 Perteau, M., Shumate, A., Perteau, G., Varabyou, A., Breitwieser, F.P., Chang, Y.,  
416 Madugundu, A.K., Pandey, A., Salzberg, S.L., 2018. CHESS: a new human gene  
417 catalog curated from thousands of large-scale RNA sequencing experiments reveals  
418 extensive transcriptional noise. *Genome Biol.* 19, 208.
- 419 Short, N.J., Rytting, M.E., Cortes, J.E., 2018. Acute myeloid leukaemia. *Lancet*. 392,  
420 593-606.
- 421 Tönjes, R.R., Czauderna, F., Kurth, R., 1999. Genome-wide screening, cloning,  
422 chromosomal assignment, and expression of full-length human endogenous  
423 retrovirus type K. *J. Virol.* 73, 9187-9195.
- 424 Venables, P.J., Brookes, S.M., Griffiths, D., Weiss, R.A., Boyd, M.T., 1995. Abundance  
425 of an endogenous retroviral envelope protein in placental trophoblasts suggests a  
426 biological function. *Virology*. 211, 589-592.
- 427 Vickers, M., Jackson, G, Taylor, P., 2000. The incidence of acute promyelocytic  
428 leukemia appears constant over most of a human lifespan, implying only one rate

429 limiting mutation. *Leukemia*. 14, 722-726.  
430 Xie, T., Pan, S., Zheng, H., Luo, Z., Tembo, K.M., Jamal, M., Yu, Z., Yu, Y., Xia, J., Yin,  
431 Q., Wang, M., Yuan, W., Zhang, Q., Xiong, J., 2018. PEG10 as an oncogene:  
432 expression regulatory mechanisms and role in tumor progression. *Cancer Cell Int*. 18,  
433 112.  
434

435 **Figure legends**

436

437 **Figure 1. Transcriptome analysis of retroviral-like gene expression**

438 Heatmap of 12 retroviral-like genes 150 RNA-seq data is shown. Log-transformed TPM  
439 scores are used to compare the mRNA expression. Red or blue indicates the high or  
440 low expression levels, respectively.

441

442 **Figure 2. ERV3-1 expression in AML M0-M3 is higher than that of M4-M5**

443 (A) Case distribution of FAB M0-M3 or M4-M5 in both ERV3-1 high (n = 30) and low  
444 groups (n = 30). (B) Comparison of ERV3-1 expression in both AML M0-M3 (n = 102)  
445 and M4-M5 (n = 44) in all cases of TCGA data. Statistical analysis was assessed by  
446 Mann-Whitney U test. Boxes denote the median, and the first and third quartile. The  
447 upper and lower whiskers represent the 90<sup>th</sup> and 10<sup>th</sup> percentile, respectively. \**P* <  
448 0.001.

449

450 **Figure 3. More than half of AML M4-M5 patients express ERV3-1 protein in tumor**  
451 **cells**

452 Immunohistochemical staining of ERV3-1 was performed using patient bone marrow  
453 samples. Tumor cells occupy the majority of bone marrow tissue. Representative of  
454 ERV3-1 (A) negative and (B) positive patients (left: low power field, right: high power  
455 field) corresponding to Table 2 are shown.

456

457

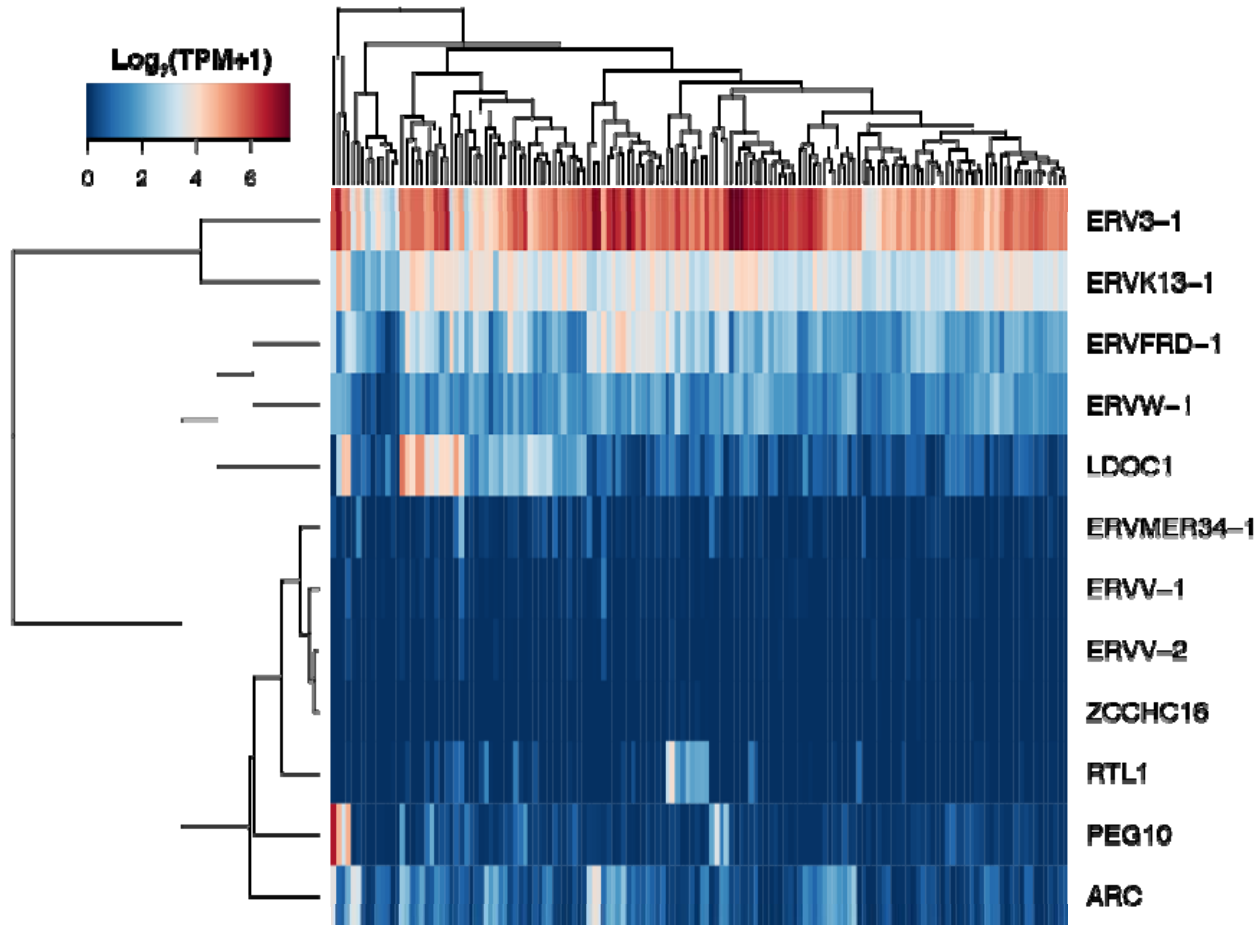

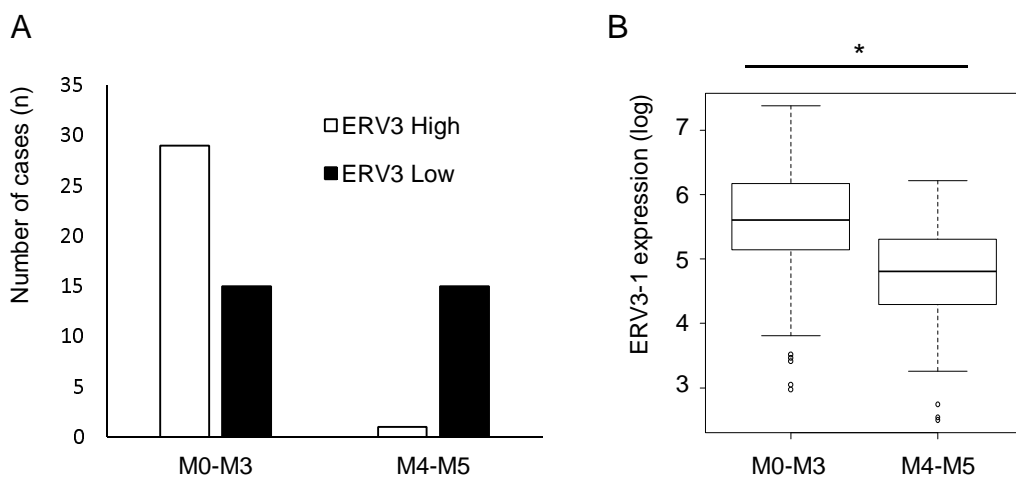

Figure 2. ERV3-1 expression of AML M0-M3 is higher than that of M4-M5

(A) Case distribution of FAB M0-M3 or M4-M5 in both ERV3-1 High (n= 30) and low groups (n=30) are shown. (B) Comparison of ERV3-1 expression of both AMLM0-M3 (n = 102) and M4-M5 (n = 44) in all cases of the TCGA data. Statistical analysis was assessed by Mann-Whitney U test. The boxes denote the median, and the first and third quartile. The upper and lower whiskers represent the 90% and 10%, respectively. \*P < 0.001.

a) ERV3-1 negative (Patient No3)

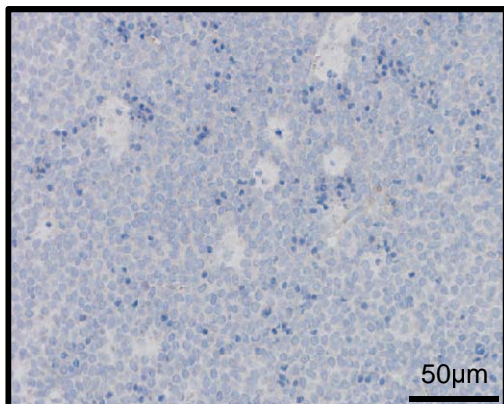

b) ERV3-1 positive (Patient No2)

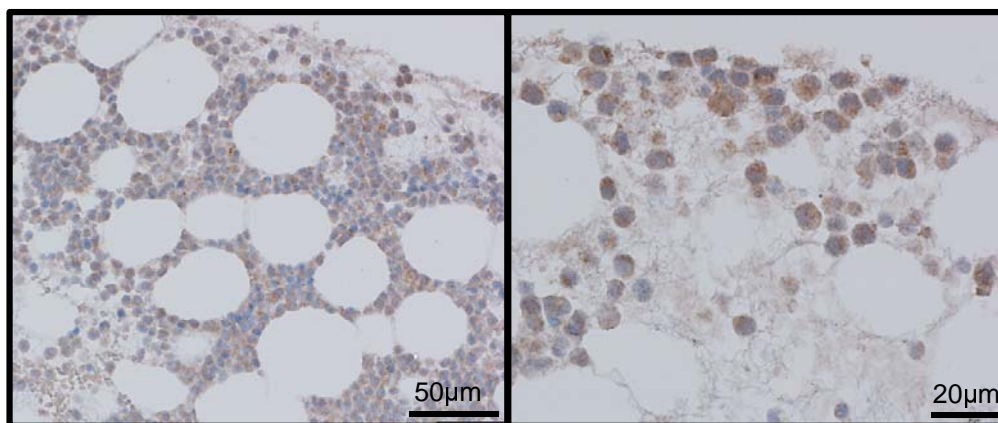

Figure 3. More than half of AML M4-M5 patients express ERV3-1 protein in tumor cells.

Immunohistochemical staining of ERV3-1 was performed using bone marrow of patient samples. Tumor cells were occupied in the majority of bone marrow tissue. Representative of ERV3-1 (A) negative and (B) positive patients (left: low power field, right: high power field) corresponding to Table 2 are shown.

Table 1. Characteristics of the TCGA-LAML patients in both ERV High (>20%) and low (<20%) groups.

| Patients                             | Total (n=60)     | ERV3 High (n=30) | ERV3 low (n=30)  | <i>P</i> |
|--------------------------------------|------------------|------------------|------------------|----------|
| Age: range (median)                  | 21-81 (56.5)     | 21-81 (56.5)     | 31-81 (56.5)     | 0.706    |
| Gender                               |                  |                  |                  | 0.796    |
| Male                                 | 32               | 17               | 15               |          |
| Female                               | 28               | 13               | 15               |          |
| FAB classification                   |                  |                  |                  | <0.001   |
| M0                                   | 7                | 5                | 2                |          |
| M1                                   | 18               | 11               | 7                |          |
| M2                                   | 15               | 9                | 6                |          |
| M3                                   | 4                | 4                | 0                |          |
| M4                                   | 10               | 1                | 9                |          |
| M5                                   | 6                | 0                | 6                |          |
| Cytogenetic risk                     |                  |                  |                  | 0.016    |
| Favorable                            | 12               | 8                | 4                |          |
| Intermediate                         | 31               | 10               | 21               |          |
| Poor                                 | 15               | 11               | 4                |          |
| Unknown                              | 2                | 1                | 1                |          |
| FAB classification                   |                  |                  |                  | <0.001   |
| M0-M3                                | 44               | 29               | 15               |          |
| M4-M5                                | 16               | 1                | 15               |          |
| Diagnostic WBC:<br>range (median)    | 1-58.5 (18)      | 1-46 (12)        | 1-58.5 (28.5)    | 0.265    |
| ERV3-1 expression:<br>range (median) | 2.50-7.38 (5.36) | 6.13-7.38 (6.44) | 2.50-4.58 (4.02) | <0.001   |

WBC: white blood cell count

Table 2. Characteristics of AMLM4-M5 patients in in our immunostaining analysis

| Patients | Age at diagnosis | gender | FAB | Biopsy Status | Diagnostic White cell count | Cytogenetic                                                   | Cytogenetic risk | ERV3-1 expression |
|----------|------------------|--------|-----|---------------|-----------------------------|---------------------------------------------------------------|------------------|-------------------|
| 1        | 79               | male   | M4  | Primary       | 2000                        | 45, X, -Y [20/20]                                             | Intermediate     | +                 |
| 2        | 78               | male   | M4  | Primary       | 27700                       | 46,XY [20/20]                                                 | Intermediate     | ++                |
| 3        | 60               | female | M4  | Primary       | 17900                       | 45, XX, -7 [20/20]                                            | poor             | -                 |
| 4        | 68               | female | M4  | Primary       | 34700                       | 46, XX,<br>t(7;11)(p15;p15)<br>[20/20]                        | Intermediate     | -                 |
| 5        | 69               | male   | M4  | Primary       | 1500                        | 46,XY,der(7)(q31),<br>Inv(16)(p13.1q22)<br>[20/20]            | favorable        | +                 |
| 6        | 53               | male   | M5  | Relapse       | 48600                       | 46,XY [20/20]                                                 | Intermediate     | ++                |
| 7        | 70               | male   | M5  | Primary       | 33800                       | 46,XY, inv(9)(p12q13)<br>[10/20]                              | Intermediate     | +                 |
| 8        | 65               | male   | M5  | Primary       | 61000                       | 47, XY, -8, +i(8)(q10)<br>×2 [20/20]                          | Intermediate     | -                 |
| 9        | 64               | male   | M5  | Primary       | 50500                       | 49,XY,+5,add(7)(q32),<br>+8,+mar [8/20]<br>/50,idem,+20[3/20] | Poor             | ++                |
| 10       | 58               | male   | M5  | Primary       | 17400                       | 47,XY,+8 [18/20]                                              | Intermediate     | -                 |
| 11       | 56               | male   | M5  | Primary       | 169800                      | 46,XY [20/20]                                                 | Intermediate     | +                 |
| 12       | 71               | male   | M5  | Primary       | 5700                        | 46,XY [20/20]                                                 | Intermediate     | -                 |
